# Supplementary material
Source: ML conference proceedings conference paper supplement (https://proceedings.mlr.press/v38/lee15b.html)
Supplement: Supplementary file [file lee15b-supp.pdf]

## A Proof of Theorem 1

Here, we give a full proof of **Theorem 1**. Recall that an equivalent construction of the PAGA graphs is obtained by collapsing the graph  $G_1^{mt}$  to  $G_m^t$  leading to  $t$  super nodes. Accordingly, based on  $G_m^t$ , we can directly generate  $G_m^{t+1}$  by (temporarily) adding  $m$  more nodes, each linking with a single edge, and then collapsing these  $m$  nodes to the  $(t+1)$ th super node. Let  $\mathbf{d}_{t,i}(v)$  denote the degree of the *super-node*  $v$  after  $mt+i-1$  edges have been introduced, the probability that the  $mt+i$ th node (or equivalently its corresponding super-node  $t+1$ ) connects to  $v$  is

$$\Pr\{(t+1, v)\} = \begin{cases} \frac{\mathbf{d}_{t,i}(v) + m(\bar{f}(v, t+1) - 1)}{(\bar{f}(\cdot, t+1) + 1)(mt+i) - 1} & 1 \leq v \leq t \\ \frac{\mathbf{d}_{t,i}(t+1) + i(\bar{f}(\cdot, t+1) - 1) + 1}{(\bar{f}(\cdot, t+1) + 1)(mt+i) - 1} & v = t+1. \end{cases} \quad (15)$$

Given these definitions, we begin with proving *statement 1*. With Eq. (9) and starting conditions

$$N(k, 1) = [k = 2m], \quad N(k, t) = N(k, t, 1) \quad (16)$$

we get a complete description of  $N(k, t)$  as Eq. (8) of *statement 1*

$$N(k, t+1) = N(k, t, m+1) + \Pr(\mathbf{d}_{t,m+1}(t+1) = k)$$

Next we prove *statement 2* which is straightforward from the definition. First, note that  $k \in \{m, m+1, \dots, 2m\}$ , i.e.:

$$\Pr(\mathbf{d}_{t,k+1}(t+1)k) = 0, \quad k < m \text{ or } k > 2m. \quad (17)$$

The minimal value  $\mathbf{d}_{t,m+1}(t+1) = m$  is obtained when no one of the  $k$  edges is a loop. In this case,  $\mathbf{d}_{t,i}(t+1) = i-1$  for all  $i$ , so:

$$\begin{aligned} \Pr(\mathbf{d}_{t,m+1}(t+1) = m) &= \prod_{i=1}^m \left( 1 - \frac{i \cdot \bar{f}(\cdot, t+1)}{(\bar{f}(\cdot, t+1) + 1)(mt+i) - 1} \right) \\ &= 1 + O_m \left( \frac{1}{t\bar{f}(\cdot, t+1)} \right). \end{aligned}$$

From  $\sum_{k=m}^{2m} \Pr(\mathbf{d}_{t,m+1} = k) = 1$  and  $\Pr(\mathbf{d}_{t,m+1} = k) \geq 0$ :

$$\Pr(\mathbf{d}_{t,m+1}(t+1) = k) = O_m \left( \frac{1}{t\bar{f}(\cdot, t+1)} \right), \quad m < d \leq 2m. \quad (18)$$

Finally the claim follows from the definition of  $[k = m]$ .

Before proving *statement 3*, we first derive some properties of  $c(k, t, i)$  and prove *statement 4* en-route. Here, for brevity, we denote  $c(k, t, i)$  as  $c(k)$ . Starting from  $c(m)$  we study the step-wise change of  $c(k)$  as:

$$\begin{aligned} c(m) &= \frac{B(m \cdot \bar{f}(m, t, i), \bar{f}(\cdot, t) + 2)}{B(m \cdot \bar{f}(m, t, i), \bar{f}(\cdot, t) + 1)} \\ &= \frac{\Gamma(\bar{f}(\cdot, t) + 2)}{\Gamma(\bar{f}(\cdot, t) + 1)} \times \frac{\Gamma(m \cdot \bar{f}(m, t, i) + \bar{f}(\cdot, t) + 1)}{\Gamma(m \cdot \bar{f}(m, t, i) + \bar{f}(\cdot, t) + 2)} \\ &= \frac{\bar{f}(\cdot, t) + 1}{m \cdot \bar{f}(m, t, i) + \bar{f}(\cdot, t) + 1} \end{aligned} \quad (19)$$

For  $k > m$ , the ratio of  $c(k, i)$  to  $c(k-1, i)$  can be simplified as:

$$\begin{aligned} \frac{c(k-1)}{c(k)} &= \frac{B(k-1 + m(\bar{f}(k-1, t, i) - 1), \bar{f}(\cdot, t) + 2)}{B(k + m(\bar{f}(k, t, i) - 1), \bar{f}(\cdot, t) + 2)} \\ &= \frac{\Gamma(k-1 + m(\bar{f}(k-1, t, i) - 1))}{\Gamma(k + m(\bar{f}(k, t, i) - 1))} \times \frac{\Gamma(k + m(\bar{f}(k, t, i) - 1) + \bar{f}(\cdot, t) + 2)}{\Gamma(k-1 + m(\bar{f}(k-1, t, i) - 1) + \bar{f}(\cdot, t) + 2)} \\ &= \frac{k + m(\bar{f}(k, t) - 1) + 1 + \bar{f}(\cdot, t)}{k-1 + m(\bar{f}(k-1, t) - 1)}, \end{aligned} \quad (20)$$

where we make the approximation  $\bar{f}(k, t, i) \simeq \bar{f}(k-1, t, i)$  with the assumption that the average similarity of nodes with degree  $k$  to node  $t$  is similar to that of nodes with degree  $k+1$ . In particular,  $c(k-1) > c(k)$ , so  $c(k) < c(m) < 1$  for all  $k \geq m$ .

Now to analyze the asymptotic behavior of  $c(k)$  we begin by taking logarithm as:

$$\begin{aligned} \ln c(k, i) &= C_0 + \ln \Gamma(k + C_1) - \ln \Gamma(k + C_1 + \bar{f}(\cdot, t) + 2) \\ C_0 &= \ln \frac{\Gamma(\bar{f}(\cdot, t) + 2)}{B(m \cdot \bar{f}(m, t, i), \bar{f}(\cdot, t) + 1)}, C_1 = m(\bar{f}(k, t, i) - 1) \end{aligned} \quad (21)$$

Exploiting the fact that asymptotically

$\Gamma(x+1) \sim \sqrt{2\pi x} \left(\frac{x}{e}\right)^x \xrightarrow{\ln} \ln \sqrt{2\pi} + x(\ln x - 1) + \frac{1}{2} \ln x$ , Eq. (21) becomes:

$$\begin{aligned} &C_0 + (k + C_1)(\ln(k + C_1) - 1) + O\left(\frac{1}{k}\right) - (k + C_1 + \bar{f}(\cdot, t) + 2)(\ln(k + C_1 + \bar{f}(\cdot, t) + 2) - 1) \\ &= C_0 + (k + C_1) \left( \ln k + \frac{C_1}{k} - 1 \right) + O\left(\frac{1}{k}\right) - (k + C_1 + \bar{f}(\cdot, t) + 2) \left( \ln k + \frac{C_1 + \bar{f}(\cdot, t) + 2}{k} - 1 \right) \\ &= C_0 - (2 + \bar{f}(\cdot, t)) \ln k + O\left(\frac{1}{k}\right) \end{aligned}$$

Rewriting the  $C_0$  term, the full expression of asymptotic value of  $c(k)$  as  $k$  grows becomes

$$c(k) = \frac{\Gamma(\bar{f}(\cdot, t) + 2)}{B(m(\bar{f}(m, t, i)), \bar{f}(\cdot, t) + 1)} k^{-2 - \bar{f}(\cdot, t)} \left( 1 + O\left(\frac{1}{k}\right) \right).$$

To prove the *statement 3*, we show

$$\begin{aligned} &N(k, t, i+1) \\ &= \sum_{v=1}^t \Pr(\mathbf{d}_{t, i+1}(v) = k) \\ &= \sum_{v=1}^t (\Pr(\mathbf{d}_{t, i+1}(v) = k, \gamma = v) + \Pr(\mathbf{d}_{t, i+1}(v) = k, \gamma \neq v)) \\ &= \sum_{v=1}^t (\Pr(\mathbf{d}_{t, i}(v) = k-1, \gamma = v) + \Pr(\mathbf{d}_{t, i}(v) = k, \gamma \neq v)) \\ &= \sum_{v=1}^t \left( \Pr(\mathbf{d}_{t, i}(v) = k-1) \frac{k-1 + m(f(v, t+1) - 1)}{(\bar{f}(\cdot, t+1) + 1)(mt+i) - 1} + \Pr(\mathbf{d}_{t, i}(v) = k) \left( 1 - \frac{k + m(f(v, t+1) - 1)}{(\bar{f}(\cdot, t+1) + 1)(mt+i) - 1} \right) \right) \\ &= N(k-1, t, i) \frac{k-1 + m(\bar{f}(k-1, t+1, i) - 1)}{(\bar{f}(\cdot, t+1) + 1) \cdot (mt+i) - 1} + N(k, t, i) \left( 1 - \frac{k + m(\bar{f}(k, t+1, i) - 1)}{(\bar{f}(\cdot, t+1) + 1) \cdot (mt+i) - 1} \right) \end{aligned} \quad (22)$$

By proving *statement 4*, we complete our proof of **Theorem 1**. For the ease of proof, let us define  $\tilde{N}(k, t, i)$ :

$$\tilde{N}(k, t, i) = N(k, t, i) - c(k, t, i) \left( t + \frac{i}{m} - \frac{1}{m(1 + \bar{f}(\cdot, t))} \right) \quad (23)$$

The lhs of (11) can be expressed in a recursive fashion as:

$$\begin{aligned} &\tilde{N}(k, t, i+1) + \frac{i}{m} [k = m] \\ &= \tilde{N}(k, t, i+1) + \frac{1}{m} [k = m] + \frac{i-1}{m} [k = m] \\ &= \tilde{N}(k, t, i+1) + [k = m] c(m, t, i) \frac{m(\bar{f}(m, t, i)) + \bar{f}(\cdot, t) + 1}{m(1 + \bar{f}(\cdot, t))} + \frac{i-1}{m} [k = m] \end{aligned}$$

$$\begin{aligned}
 &= N(k, t, i + 1) - c(k, t, i) \frac{(\bar{f}(\cdot, t) + 1)(mt + i + 1) - 1}{m(1 + \bar{f}(\cdot, t))} - c(m, t, i) \frac{[k = m](m(\bar{f}(m, t, i)) + \bar{f}(\cdot, t) + 1)}{m(1 + \bar{f}(\cdot, t))} + \frac{i - 1}{m} [k = m] \\
 &= N(k, t, i + 1) - \left( \frac{(\bar{f}(\cdot, t) + 1)(mt + i) - 1}{m(\bar{f}(\cdot, t) + 1)} \right) \\
 &\quad \times c(k, t, i) \frac{(\bar{f}(\cdot, t) + 1)(mt + i + 1) - 1 - [k = m](k + m(\bar{f}(k, t) - 1) + \bar{f}(\cdot, t) + 1)}{(1 + \bar{f}(\cdot, t)) \cdot (mt + i) - 1} + \frac{i - 1}{m} [k = m] \\
 &= N(k, t, i + 1) + \frac{i - 1}{m} [k = m] - \left( t + \frac{i}{m} - \frac{1}{m(1 + \bar{f}(\cdot, t))} \right) \frac{c(k, i)}{(1 + \bar{f}(\cdot, t))(mt + i) - 1} \\
 &\quad \times \left\{ (1 - [k = m]) (k + m(\bar{f}(k, t, i) - 1) + 1 + \bar{f}(\cdot, t)) + \left( (\bar{f}(\cdot, t) + 1)(mt + i) - 1 \right) - \left( k + m(\bar{f}(k, t, i) - 1) \right) \right\} \\
 &= N(k, t, i + 1) + \frac{i - 1}{m} [k = m] - \left( t + \frac{i}{m} - \frac{1}{m(1 + \bar{f}(\cdot, t))} \right) \\
 &\quad \times \left( c(k - 1, t, i) \frac{k - 1 + m(\bar{f}(k - 1, t, i) - 1)}{(1 + \bar{f}(\cdot, t)) \cdot (mt + i) - 1} + c(k, i) \left( 1 - \frac{k + m(\bar{f}(k, t, i) - 1)}{(1 + \bar{f}(\cdot, t))(mt + i) - 1} \right) \right) \\
 &= \tilde{N}(k - 1, t, i) \frac{k - 1 + m(\bar{f}(k - 1, t, i) - 1)}{(1 + \bar{f}(\cdot, t)) \cdot (mt + i) - 1} + \tilde{N}(k, t, i) \left( 1 - \frac{k + m(\bar{f}(k, t, i) - 1)}{(1 + \bar{f}(\cdot, t))(mt + i) - 1} \right) + \frac{i - 1}{m} [k = m]
 \end{aligned}$$

Note that the last line comes from Eq. (22) and Eq. (23). Now, in a fashion similar to [18] involving manipulations like the ones done above, we have  $\tilde{N}(k, t, i) + [k = m] \frac{i-1}{m} = O_m\left(\frac{1}{k}\right)$  finishing the proof of the theorem.

## B Proof of Theorem 3

The proof of the bound on the diameter for PAGA graphs can be obtained by extending the original proof for the standard preferential attachment model from a uniform measure to a non-uniform measure, described by the affinity function  $f$ . Here, we ignore the case of having disconnected components in a graph as the graph will be one connected component with high probability.<sup>2</sup> As self loops do not affect the eccentricity of a node and hence the diameter, we simply ignore them in the generation process itself – for the purpose of bounding the diameter.

We begin the proof by noting that for  $m = 1$  the graph is a tree and for the cases  $m \geq 2$ , which are formed by collapsing the graph  $G_1^{mt}$  graph, the diameter can only shrink. Next, the diameter of the graph can not be larger than twice the height of this tree, which is equal to the maximal graph distance between vertex 1 and any of the other vertices. So, it is sufficient to bound the height of the tree.

For bounding the tree height, we follow the steps of [48] and outline here the differences.<sup>3</sup> We start with a continuous time branching process, where the rate is given by  $\lambda^t(j) = d(j) + f(j, t)$ . Therefore, the overall transition rate after  $t$  vertices are present (i.e. after  $t - 1$  births) is given by:

$$\sum_{j=1}^t (d(j) + f(t, j)) = 2t + t\bar{f}(\cdot, t + 1) \tag{24}$$

Now we can decompose the time  $\tau_t$  as a sum of independent variables, exponentially distributed with parameter  $2t + t\bar{f}(\cdot, t + 1)$ , i.e.

$$\tau_t = \sum_{j=1}^t \mathbf{t}_j$$

where  $\mathbf{t}_j \sim \text{Exp}(2j + j\bar{f}(\cdot, j + 1))$ . It follows that the mean and variance are bounded by

$$\mathbf{E}[\tau_t] = \sum_{j=1}^t \frac{1}{2j + j\bar{f}(\cdot, j + 1)} = O(\log t)$$

<sup>2</sup>In order for a PAGA graph to have a disconnected component, a new super-node  $t + 1$  has to make  $m$  self loops. This probability asymptotically goes to 0. Note that even in the uniform case this probability is  $\frac{1}{t}^m$ , while the self-loop probability in PAGA is typically smaller than  $1/t$ .

<sup>3</sup>To avoid clash of notations, we also redefine the birth times as  $\tau_1, \dots, \tau_t$  instead of  $t_i$ .

$$\text{var}(\tau_t) = \sum_{j=1}^t \frac{1}{2j + j\bar{f}(\cdot, j+1)} = O(1)$$

These conditions match the ones required in [48]. Accordingly, the small world property holds for the PAGA model.

### C Proof of Theorem 4

Note that at every timestep, there can be at most  $\frac{m(m-1)}{2}$  new triangles added. So the number of triangles  $T(G_m^t)$  is bounded by  $O(n)$ . On the other hand, the number of triplets in  $G_m^t$  follows  $\sum_{k=1}^{d_{max}} N(k, t) \binom{k}{2} \propto \sum_{k=1}^{d_{max}} t \cdot k^{\bar{f}(\cdot, t)}$ .

As the sum  $\sum_{k=1}^{d_{max}} k = mt$ , it is straightforward that  $C(G_m^t) \rightarrow 0$  unless  $\bar{f}(\cdot, t) > 1$ . We omit the analysis for the cases where  $\bar{f}(\cdot, t) > 1$  as real graphs follow power law exponent around -2.1 to -2.5 ( $0.1 \leq \bar{f}(\cdot, t) \leq 0.5$ )  $\square$

### D Spyplot of $W$

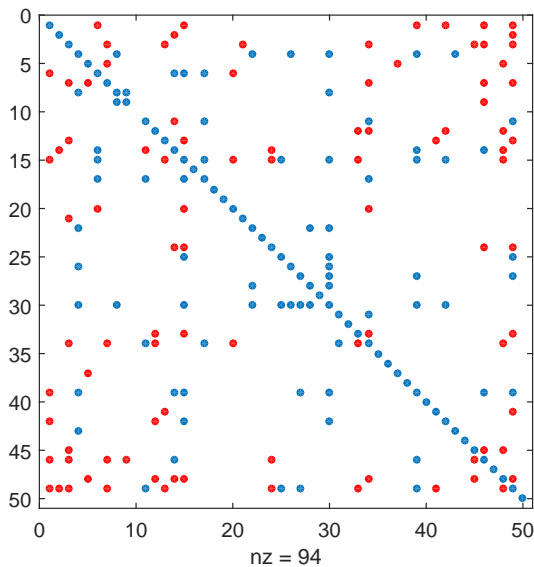

Figure 6: Spyplot of the matrix  $W$ . Blue entries correspond to positive elements; red entries to negative elements

## E Topics and keywords learned by LDA

We used 50 topics (i.e.  $W$  is a  $50 \times 50$  matrix) for learning the affinity function  $f$ . Here, we represent the top 20 keywords for top 10 topics we obtained from LDA.

| Topic 0         | Topic 1        | Topic 2         | Topic 3         | Topic 4     |
|-----------------|----------------|-----------------|-----------------|-------------|
| method          | quantization   | gauge           | theory          | gauge       |
| integral        | hamiltonian    | invariant       | field           | magnetic    |
| path            | dirac          | invariance      | approach        | nonabelian  |
| using           | zero           | local           | based           | abelian     |
| functional      | modes          | brst            | discuss         | chernsimons |
| regularization  | canonical      | lagrangian      | nonperturbative | electric    |
| approach        | physical       | covariant       | presented       | charge      |
| formula         | lightcone      | constraints     | properties      | theory      |
| use             | coordinates    | formulation     | new             | monopole    |
| integrals       | shown          | formalism       | methods         | su          |
| expansion       | quantized      | class           | may             | monopoles   |
| used            | formalism      | first           | present         | flux        |
| series          | variables      | ghost           | talk            | charged     |
| procedure       | mode           | cohomology      | version         | higgs       |
| technique       | constraint     | extended        | interpretation  | dual        |
| applied         | leads          | fields          | developed       | term        |
| obtained        | operator       | lorentz         | techniques      | vortex      |
| integration     | approach       | fixing          | provide         | selfdual    |
| expression      | constraints    | transformations | used            | vortices    |
| formalism       | formulation    | auxiliary       | analysis        | yangmills   |
| Topic 5         | Topic 6        | Topic 7         | Topic 8         | Topic 9     |
| n               | matrix         | coupling        | loop            | form        |
| supersymmetric  | model          | point           | theory          | general     |
| supersymmetry   | matrices       | limit           | perturbation    | parameters  |
| supergravity    | ansatz         | fixed           | renormalization | arbitrary   |
| superconformal  | spectral       | large           | wilson          | given       |
| super           | models         | strong          | finite          | explicit    |
| superspace      | relation       | flow            | perturbative    | parameter   |
| yangmills       | limit          | points          | expansion       | q           |
| multiplet       | integrable     | constant        | one             | values      |
| superfield      | spin           | group           | order           | set         |
| multiplets      | smatrix        | renormalization | loops           | independent |
| cal             | scattering     | weak            | non             | can         |
| bps             | elements       | theory          | result          | terms       |
| theories        | eigenvalues    | infrared        | lambda          | one         |
| harmonic        | chain          | constants       | cutoff          | structure   |
| susy            | bethe          | rg              | diagrams        | forms       |
| superfields     | corresponding  | behavior        | divergences     | present     |
| supersymmetries | factors        | view            | expectation     | real        |
| sym             | related        | critical        | values          | allows      |
| large           | representation | expansion       | scheme          | shows       |

## References

- [1] P. Erdős and A. Rényi, “On the evolution of random graphs,” *Publ. Math. Inst. Hungary. Acad. Sci.*, vol. 5, pp. 17–61, 1960.
- [2] P. G. Buckley and D. Osthus, “Popularity based random graph models leading to a scale-free degree sequence,” *Discrete Mathematics*, vol. 282, pp. 53–68, 2001.
- [3] J. Pitman and M. Yor, “The two-parameter poisson-dirichlet distribution derived from a stable subordinator,” *Annals of Probability*, vol. 25, no. 2, pp. 855–900, 1997.
- [4] R. Kumar, J. Novak, and A. Tomkins, “Structure and evolution of online social networks.” 2006, pp. 611–617.
- [5] S.-H. Yang, B. Long, A. Smola, N. Sadagopan, Z. Zheng, and H. Zha, “Like like alike: joint friendship and interest propagation in social networks,” in *International conference on World wide web*. ACM, 2011, pp. 537–546.
- [6] M. De Choudhury, W. A. Mason, J. M. Hoffman, and D. J. Watts, “Inferring relevant social networks from interpersonal communication,” in *WWW*, 2010, pp. 301–310.
- [7] F. Chierichetti, R. Kumar, S. Lattanzi, M. Mitzenmacher, A. Panconesi, and P. Raghavan, “On compressing social networks,” in *ACM SIGKDD international conference on Knowledge discovery and data mining*. ACM, 2009, pp. 219–228.
- [8] F. Chierichetti, R. Kumar, S. Lattanzi, A. Panconesi, and P. Raghavan, “Models for the compressible web,” *SIAM Journal on Computing*, vol. 42, no. 5, pp. 1777–1802, 2013.
- [9] D. M. Blei and P. I. Frazier, “Distance dependent chinese restaurant processes,” *J. Mach. Learn. Res.*, vol. 12, pp. 2461–2488, 2011.
- [10] P. Erdős and A. Rényi, “On random graphs,” *Publicationes Mathematicae Debrecen*, vol. 6, pp. 290–297, 1959.
- [11] P. Erdős and A. Rényi, “On the strength of connectedness of a random graph,” *Acta Mathematica Hungarica*, vol. 12, no. 1, pp. 261–267, 1961.
- [12] R. Durrett, *Random graph dynamics*. Cambridge university press Cambridge, 2007, vol. 200, no. 7.
- [13] M. Faloutsos, P. Faloutsos, and C. Faloutsos, “On power-law relationships of the internet topology,” in *SIGCOMM*, 1999, pp. 251–262.
- [14] A. Clauset, C. R. Shalizi, and M. E. Newman, “Power-law distributions in empirical data,” *SIAM review*, vol. 51, no. 4, pp. 661–703, 2009.
- [15] A.-L. Barabási and R. Albert, “Emergence of scaling in random networks,” *science*, vol. 286, no. 5439, pp. 509–512, 1999.
- [16] B. Bollobás, O. Riordan, J. Spencer, G. Tusnády *et al.*, “The degree sequence of a scale-free random graph process,” *Random Structures & Algorithms*, vol. 18, no. 3, pp. 279–290, 2001.
- [17] C. Antoniak, “Mixtures of Dirichlet processes with applications to Bayesian nonparametric problems,” *Annals of Statistics*, vol. 2, pp. 1152–1174, 1974.
- [18] E. A. Grechnikov, “Degree distribution and number of edges between nodes of given degrees in the buckley–osthus model of a random web graph,” *Internet Mathematics*, vol. 8, no. 3, pp. 257–287, 2012.
- [19] J. Chang and D. M. Blei, “Relational topic models for document networks,” in *International Conference on Artificial Intelligence and Statistics*, 2009, pp. 81–88.
- [20] D. Blei and M. Jordan, “Modeling annotated data,” in *Proceedings of the 26th annual international ACM SIGIR conference on Research and development in information retrieval*. ACM Press, 2003, pp. 127–134.
- [21] E. M. Airoldi, D. M. Blei, S. E. Fienberg, and E. P. Xing, “Mixed-membership stochastic block-models.” vol. 9, pp. 1981–2014, 2008.
- [22] P. Orbanz and D. M. Roy, “Bayesian models of graphs, arrays and other exchangeable random structures,” *arXiv preprint arXiv:1312.7857*, 2013.
- [23] O. Kallenberg, *Probabilistic symmetries and invariance principles*. Springer, 2005, vol. 9.
- [24] T. Snijders, “Markov chain monte carlo estimation of exponential random graph models,” *Journal of Social Structure*, vol. 3, no. 2, 2002.
- [25] M. S. Handcock, G. Robins, T. A. Snijders, J. Moody, and J. Besag, “Assessing degeneracy in statistical models of social networks,” Working paper, Tech. Rep., 2003.
- [26] L. Lovász, *Large networks and graph limits*. American Mathematical Soc., 2012, vol. 60.
- [27] P. J. Wolfe and S. C. Olhede, “Nonparametric graphon estimation,” *ArXiv e-prints*, Sep. 2013.

- [28] A. Z. Jacobs and A. Clauset, “A unified view of generative models for networks: models, methods, opportunities, and challenges,” *ArXiv e-prints*, Nov. 2014.
- [29] M. Kim and J. Leskovec, “Multiplicative attribute graph model of real-world networks,” 1009.
- [30] A. Santiago and R. Benito, “An extended formalism for preferential attachment in heterogeneous complex networks,” *EPL (Europhysics Letters)*, vol. 82, no. 5, p. 58004, 2008.
- [31] A. Flaxman, A. Frieze, and J. Vera, “A geometric preferential attachment model of networks,” in *Algorithms and Models for the Web-Graph*, ser. Lecture Notes in Computer Science, S. Leonardi, Ed., vol. 3243. Springer Berlin Heidelberg, 2004, pp. 44–55.
- [32] A. D. Flaxman, A. M. Frieze, and J. Vera, “A geometric preferential attachment model of networks ii,” *Internet Math.*, vol. 4, no. 1, pp. 87–112, 2007.
- [33] M. Zhukovskiy, D. Vinogradov, Y. Pritykin, L. Ostroumova, E. Grechnikov, G. Gusev, P. Serdyukov, and A. M. Raigorodskii, “Empirical validation of the buckley–osthus model for the web host graph: Degree and edge distributions,” *ArXiv e-prints*, vol. abs/1208.2355, 2012.
- [34] M. Araujo, S. Günnemann, G. Mateos, and C. Faloutsos, “Beyond blocks: Hyperbolic community detection,” in *Machine Learning and Knowledge Discovery in Databases - European Conference, ECML PKDD 2014, Nancy, France, September 15-19, 2014. Proceedings, Part I*, 2014, pp. 50–65.
- [35] W. Hoeffding, “Probability inequalities for sums of bounded random variables,” *Journal of the American Statistical Association*, vol. 58, pp. 13–30, 1963.
- [36] K. Azuma, “Weighted sums of certain dependent random variables,” *Tohoku Mathematical Journal*, vol. 19, no. 3, pp. 357–367, 1967.
- [37] J. Leskovec, J. M. Kleinberg, and C. Faloutsos, “Graphs over time: densification laws, shrinking diameters and possible explanations,” in *ACM SIGKDD International Conference on Knowledge Discovery and Data Mining, Chicago, Illinois, USA, August 21-24, 2005*, 2005, pp. 177–187.
- [38] J. M. Kleinberg, R. Kumar, P. Raghavan, S. Rajagopalan, and A. Tomkins, “The web as a graph: Measurements, models, and methods,” in *COCON*, 1999, pp. 1–17.
- [39] A. Z. Broder, R. Kumar, F. Maghoul, P. Raghavan, S. Rajagopalan, R. Stata, A. Tomkins, and J. L. Wiener, “Graph structure in the web,” *Computer Networks*, vol. 33, no. 1-6, pp. 309–320, 2000.
- [40] C. E. Tsourakakis, “Fast counting of triangles in large real networks without counting: Algorithms and laws,” in *Proceedings of the IEEE International Conference on Data Mining (ICDM 2008), December 15-19, 2008, Pisa, Italy*, 2008, pp. 608–617.
- [41] D. Chakrabarti, Y. Zhan, and C. Faloutsos, “R-MAT: A recursive model for graph mining,” in *Proceedings of the SIAM International Conference on Data Mining, Lake Buena Vista, Florida, USA, April 22-24, 2004*, 2004, pp. 442–446.
- [42] I. J. Farkas, I. Derényi, A.-L. Barabási, and T. Vicsek, “Spectra of real-world graphs: Beyond the semicircle law,” *Physical Review E*, vol. 64, no. 2, p. 026704, 2001.
- [43] S. Milgram, “The small world problem,” *Psychology today*, vol. 2, no. 1, pp. 60–67, 1967.
- [44] S. L. Tauro, C. R. Palmer, G. Siganos, and M. Faloutsos, “A simple conceptual model for the internet topology,” in *Proceedings of the Global Telecommunications Conference, 2001. GLOBECOM '01, San Antonio, TX, USA, 25-29 November, 2001*, 2001, pp. 1667–1671.
- [45] R. Albert and A.-L. Barabási, “Statistical mechanics of complex networks,” *Reviews of modern physics*, vol. 74, no. 1, p. 47, 2002.
- [46] C. R. Palmer, P. B. Gibbons, and C. Faloutsos, “ANF: a fast and scalable tool for data mining in massive graphs,” in *Proceedings of the Eighth ACM SIGKDD International Conference on Knowledge Discovery and Data Mining, July 23-26, 2002, Edmonton, Alberta, Canada*, 2002, pp. 81–90.
- [47] J. Kunegis, “KONECT: the koblenz network collection,” in *22nd International World Wide Web Conference, WWW '13, Rio de Janeiro, Brazil, May 13-17, 2013, Companion Volume*, 2013, pp. 1343–1350.
- [48] B. Pittel, “Note on the heights of random recursive trees and random m-ary search trees,” *Random Structures & Algorithms*, vol. 5, no. 2, pp. 337–347, 1994.
